# Supplementary material for: Biological impact of ocean alkalinity enhancement of magnesium hydroxide on marine microalgae using bioassays simulating ship-based dispersion
Source: Copernicus journal article supplement (doi:10.5194/bg-2023-138), 2023-08-17

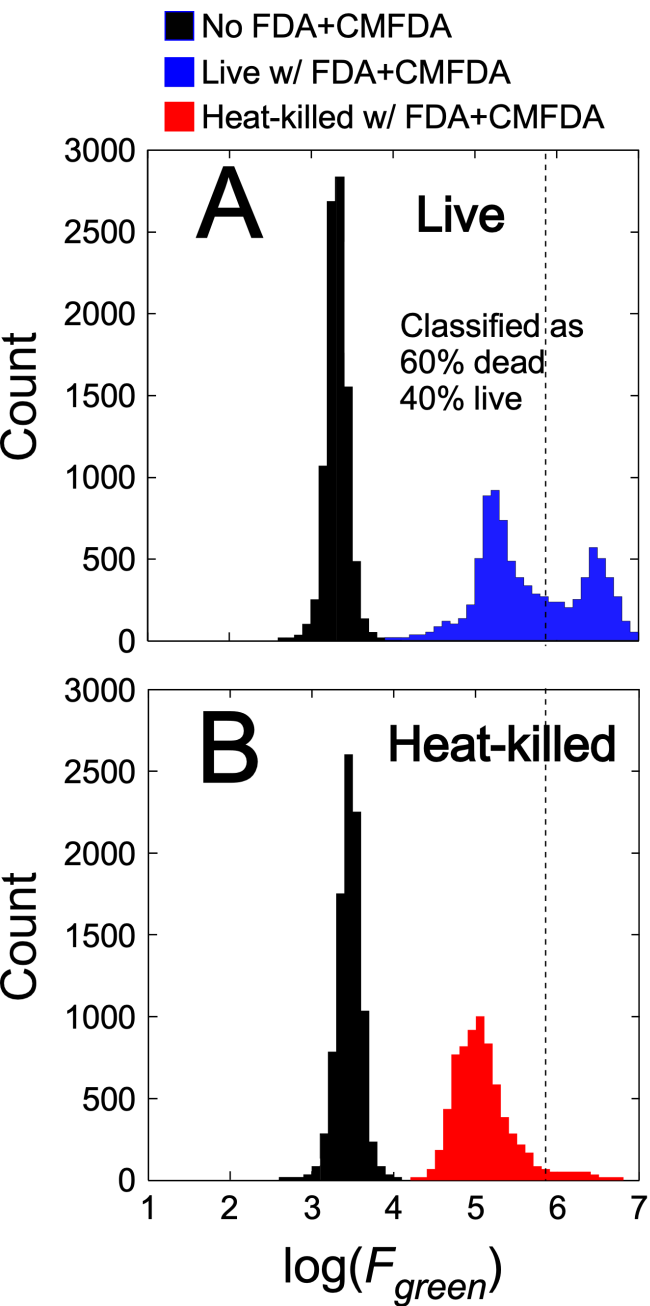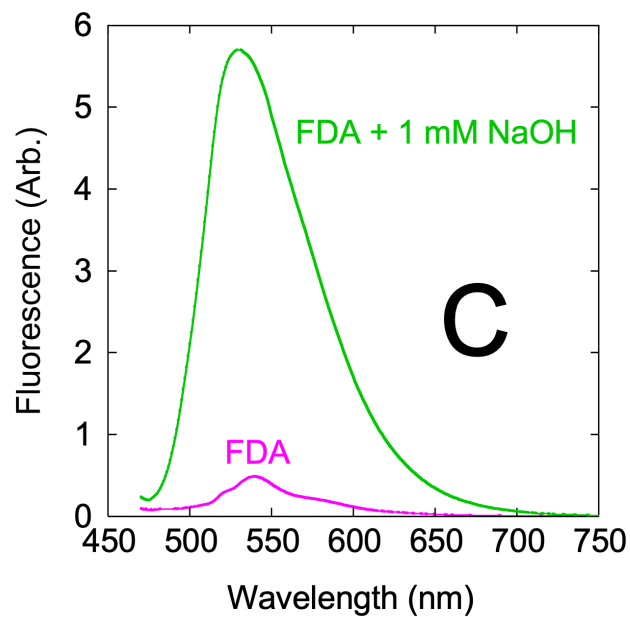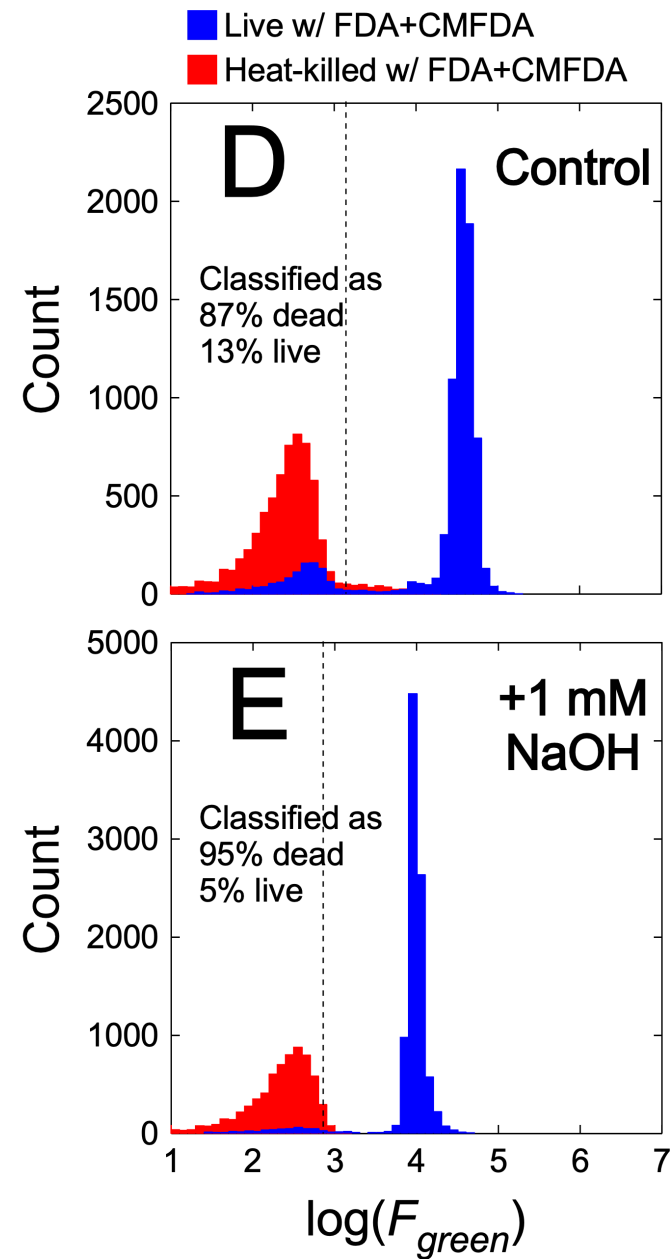

Supplement: Supplementary file [file bg-2023-138-CC3-supplement.pdf]
